# Supplementary material for: Label-Free Immunosensor Based on Polyaniline-Loaded MXene and Gold-Decorated β-Cyclodextrin for Efficient Detection of Carcinoembryonic Antigen
Source: MDPI journal article supplement (doi:10.3390/bios12080657), 2022-08-19
Supplement: s1 [file s1]

# Supplementary Materials: Label-Free Immunosensor Based on Polyaniline-Loaded MXene and Gold-Decorated $\beta$ -Cyclodextrin for Efficient Detection of Carcinoembryonic Antigen

Qi Wang, Huaqian Xin and Zhou Wang \*

Key Laboratory of Liquid-Solid Structural Evolution and Processing of Materials of Ministry of Education, School of Materials Science and Engineering, Shandong University, Jinan 250061, China; wangqi1016@sdu.edu.cn (Q.W.); 15665812750@163.com (H.X.)

\* Correspondence: wangzhou@sdu.edu.cn

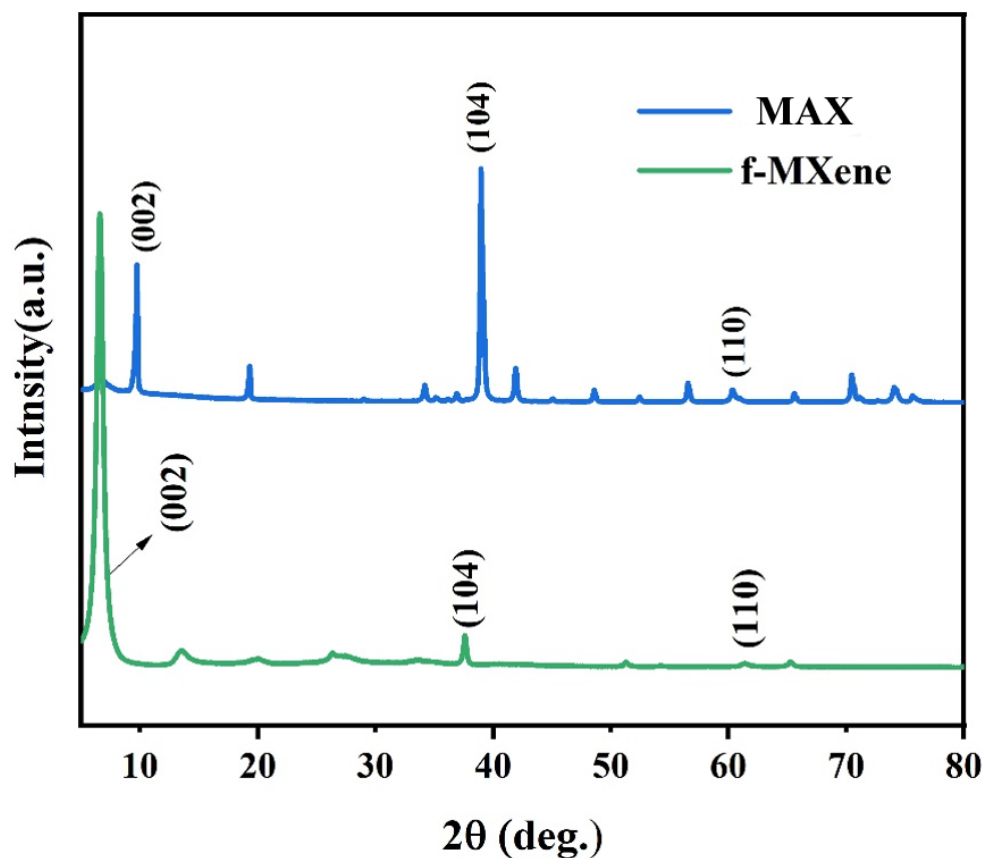

Figure S1. XRD patterns of MAX and f-MXene.

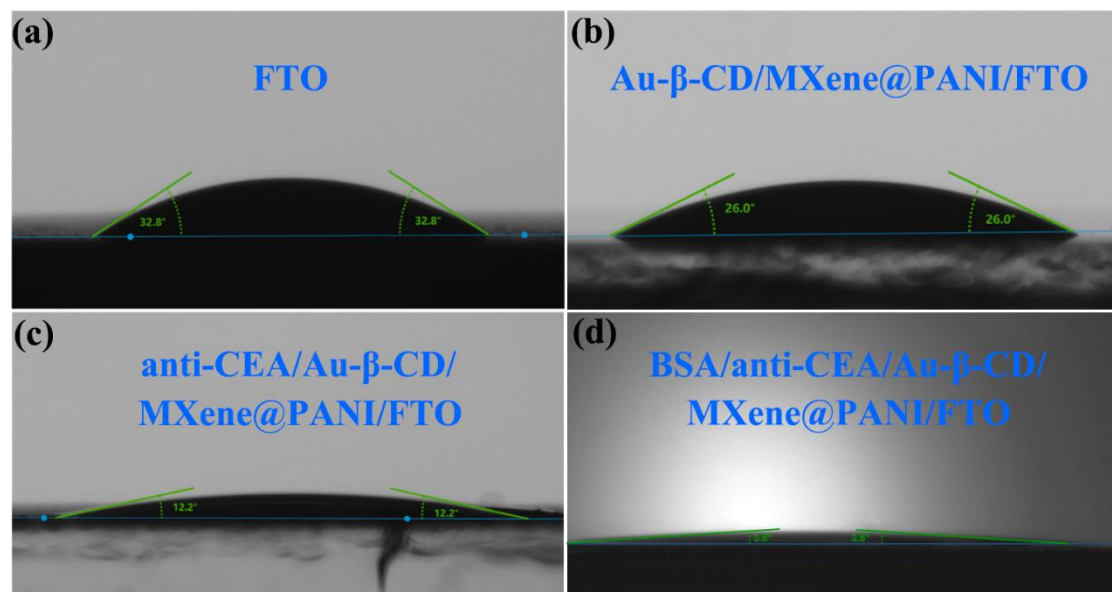

**Figure S2.** Water contact angle of different electrode (a)FTO, (b)Au-β-CD/MXene@PANI/FTO, (c) anti-CEA/Au-β-CD/MXene@PANI/FTO and (d) BSA/anti-CEA/Au-β-CD/MXene@PANI/FTO.

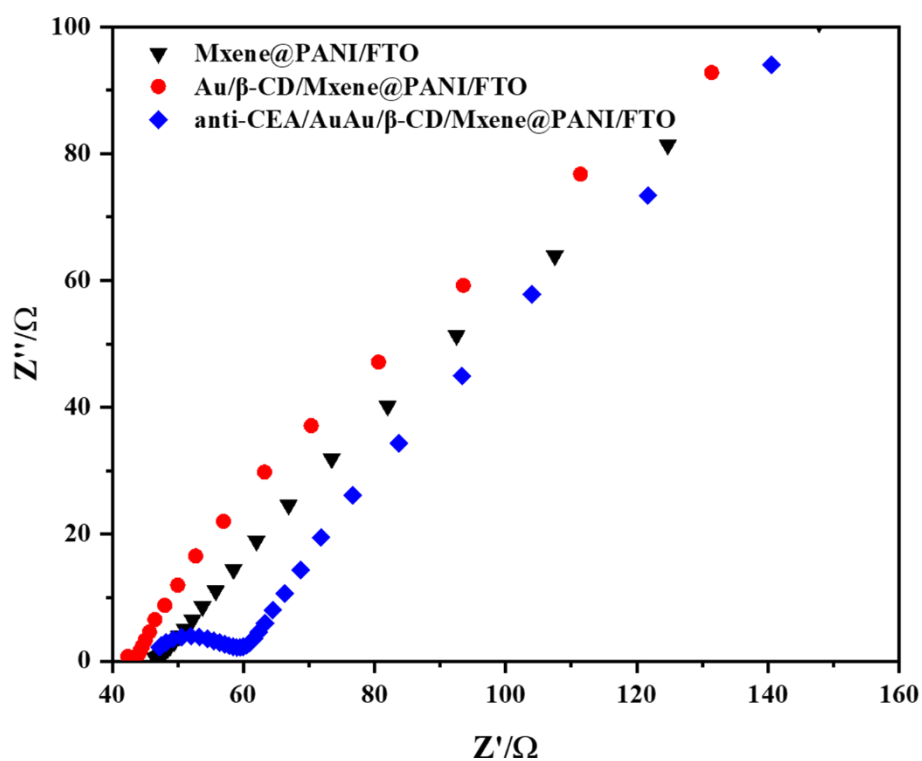

**Figure S3.** Amplification of electrochemical impedance curves of different modified electrodes.

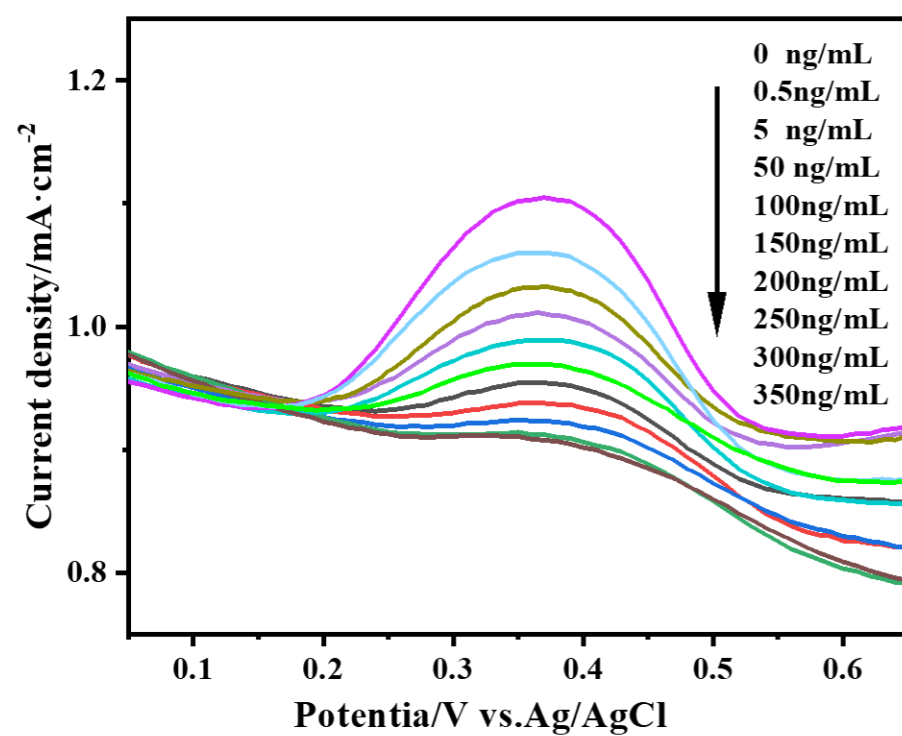

**Figure S4.** DPV responses for label free immunosensor to CEA at the concentration of 0, 0.5, 5, 50, 150, 200, 250, 300, 350 ng/mL in 0.01M PBS containing 5.0 mM  $[\text{Fe}(\text{CN})_6]^{3-/4-}$ .
